# Supplementary material for: Genome-Wide Identification and Characterization of the GmSnRK2 Family in Soybean
Source: PubMed Central journal article supplement (PMC5618483; doi:10.3390/ijms18091834), 2017-08-23
Supplement: ijms-18-01834-s001.pdf [file ijms-18-01834-s001.pdf]

# Genome-Wide Identification and Characterization of the *GmSnRK2* Family in Soybean

Wei Zhao †, Yi-Hui Cheng †, Chi Zhang, Xin-Jie Shen, Qing-Bo You, Wei Guo, Xiang Li, Xue-Jiao Song, Xin-An Zhou and Yong-Qing Jiao \*

Table S1. List of AtSnRK2s and OsSnRK2s.

| Taxa Name                   | Gene name       | Accession number or locus ID | Uniprot | Proten length (aa) |
|-----------------------------|-----------------|------------------------------|---------|--------------------|
| <i>Arabidopsis thaliana</i> | <i>AtSRK2H</i>  | AT5G63650                    | Q9FFP9  | 360                |
|                             | <i>AtSRK2J</i>  | AT2G23030                    | O64812  | 339                |
|                             | <i>AtSRK2A</i>  | AT1G10940                    | P43291  | 363                |
|                             | <i>AtSRK2B</i>  | AT1G60940                    | Q9C958  | 361                |
|                             | <i>AtSRK2F</i>  | AT4G40010                    | Q9SMQ4  | 350                |
|                             | <i>AtSRK2C</i>  | AT1G78290                    | Q9M9E9  | 343                |
|                             | <i>AtSRK2I</i>  | AT5G66880                    | Q39193  | 361                |
|                             | <i>AtSRK2D</i>  | AT3G50500                    | Q39192  | 362                |
|                             | <i>AtSRK2E</i>  | AT4G33950                    | Q940H6  | 362                |
|                             | <i>AtSRK2G</i>  | AT5G08590                    | P43292  | 353                |
|                             | <i>OsSAPK6</i>  | LOC_Os02g34600               | Q6Z144  | 365                |
|                             | <i>OsSAPK4</i>  | LOC_Os01g64970               | F6M7C8  | 360                |
|                             | <i>OsSAPK5</i>  | LOC_Os04g59450               | Q7XKA8  | 370                |
|                             | <i>OsSAPK2</i>  | LOC_Os07g42940               | Q0D4J7  | 339                |
| <i>Oryza sativa</i>         | <i>OsSAPK3</i>  | LOC_Os10g41490               | P0C5D6  | 334                |
|                             | <i>OsSAPK1</i>  | LOC_Os03g27280               | Q75LR7  | 342                |
|                             | <i>OsSAPK8</i>  | LOC_Os03g55600               | F6M7D2  | 371                |
|                             | <i>OsSAPK10</i> | LOC_Os03g41460               | Q75H77  | 362                |
|                             | <i>OsSAPK9</i>  | LOC_Os12g39630               | Q75V57  | 361                |
|                             | <i>OsSAPK7</i>  | LOC_Os04g35240               | Q7XQP4  | 359                |

Table S2. List of primers for qRT-PCR.

| Gene name         | Forward primer (5' > 3') | Reverse primer (5' > 3')  |
|-------------------|--------------------------|---------------------------|
| <i>GmSnRK2.1</i>  | GGTCCCCGCAGCTGGTATG      | TGACCCTGCAGAGAGAATCACTATT |
| <i>GmSnRK2.2</i>  | CGTAGTCGGGTATGGCGTAT     | ATGTTTGGTCGTGTGGTGTG      |
| <i>GmSnRK2.3</i>  | CAGCAACAAGTTCCTCAGTATGTT | TGTTGGGCCAGGAATGGATTT     |
| <i>GmSnRK2.4</i>  | TCAGCATCAAAGTCATCCAGG    | GCCCATGGAAGTACGCGA        |
| <i>GmSnRK2.5</i>  | GGGTCATCCTGGTCTCTCAA     | TCATCTTTGCTGCACTCAGC      |
| <i>GmSnRK2.6</i>  | GCACAGACAAAATCACCGCTT    | TGCAAAAATGATGATGTGAATGACG |
| <i>GmSnRK2.7</i>  | GCCTAGATACTGGAGGAGGG     | TGTAGCAAATCCATTAAGGAGAATA |
| <i>GmSnRK2.8</i>  | GTCCAACCTTCTCCTGCTTTGG   | CCAAGAGGATCACCATCCCCG     |
| <i>GmSnRK2.9</i>  | CTTTAAACGAGGTGCCGAGC     | ACTGAGGATGAGGCTCGATT      |
| <i>GmSnRK2.10</i> | ATCATCCTGGTCTCTCAAAGGG   | CTGCATTTCGCGACCGAAAATC    |
| <i>GmSnRK2.11</i> | TCGTCATCAATGTCCAAGCTA    | GAACACGATGAACAGGCAA       |
| <i>GmSnRK2.12</i> | TCTATCTGCTTTTCACCTCTCTCA | CCGGGAATGGATTTGCCGAT      |
| <i>GmSnRK2.13</i> | GCAAGATGAGTTGGAGTAAGC    | CAGGAACTTTGGTGTGGCA       |
| <i>GmSnRK2.14</i> | TCATCTTCTTCAGTCTCAGCCA   | GCTCAAGCTGCCTACTACAG      |
| <i>GmSnRK2.15</i> | CCTCATCACACGCACAAC       | GGCTGAAAGAAGGGGTTACG      |
| <i>GmSnRK2.16</i> | CCTCATCACACGCACAAC       | GGCTGAAAGAAGGGGTTACG      |
| <i>GmSnRK2.17</i> | GTCCCTGCAGCGGGTAT        | TGCAGAGAGAATCACTATTCTCTGA |
| <i>GmSnRK2.18</i> | CTTCTTCAGCCTCGGTCCT      | TTGTTGAGGAGGCCAAGACT      |
| <i>GmSnRK2.19</i> | CATGCTGCCCAATAAGAAGG     | AGGAACTTGCCCATAGAACAGATG  |
| <i>GmSnRK2.20</i> | GAATTGAAGATACATACCTTGCCA | TGGTGCATACCCATTTGAAGAT    |
| <i>GmSnRK2.21</i> | ATCCTCGGTAACACGCCCA      | ATAGAGGAGGGGCAATCACATT    |
| <i>GmSnRK2.22</i> | CCGTCTTAGGTCCTCATCC      | GCCTGATCAACCAATGCAGA      |
| <i>GmSKIP</i>     | GAGCCCAAGACATTGCCGAGAG   | CGGAAGCGAAGAAGTGAACC      |

**Table S3.** Defense and stress response elements in the promoters of *GmSnRK2s*.

| Gene Name        | Cis Elements    | Number | Sequence Pattern                       | Position (Strand)                         | Function                                                                |
|------------------|-----------------|--------|----------------------------------------|-------------------------------------------|-------------------------------------------------------------------------|
| <i>GmSnRK2.1</i> | TC-rich repeats | 3      | GTTTCTTAC;<br>ATTTCTTCA;<br>ATTCTCTAAC | -610 bp (-); -916 bp (+);<br>-790 bp (+)  | <i>Cis-acting</i> element involved in defense and stress responsiveness |
| <i>GmSnRK2.2</i> | Circadian       | 1      | CAANNNNATC                             | -812 bp (-)                               | <i>Cis-acting</i> regulatory element involved in circadian control      |
|                  | TC-rich repeats | 2      | GTTTCTTAC;<br>ATTTCTTCA                | -226 bp (+); -1364 bp (+)                 | <i>Cis-acting</i> element involved in defense and stress responsiveness |
|                  | HSE             | 3      | AAAAAATTTC                             | -126 bp (+); -919 bp (-);<br>-309 bp (-)  | <i>Cis-acting</i> element involved in heat stress responsiveness        |
|                  | WUN-motif       | 1      | AAATTCCT                               | -917 bp (-)                               | wound-responsive element                                                |
| <i>GmSnRK2.3</i> | Circadian       | 3      | CAANNNNATC                             | -227 bp (-); -1451 bp (+);<br>-980 bp (+) | <i>Cis-acting</i> regulatory element involved in circadian control      |
|                  | LTR             | 1      | CCGAAA                                 | -1332 bp (-)                              | <i>Cis-acting</i> element involved in low-temperature responsiveness    |
|                  | MBS             | 1      | CAACTG                                 | -1146 bp (+)                              | MYB binding site involved in drought-inducibility                       |
|                  | TC-rich repeats | 3      | ATTTCTTCA;<br>ATTTCTCCA                | -322 bp (+); -451 bp (+);<br>-690 bp (+)  | <i>Cis-acting</i> element involved in defense and stress responsiveness |
|                  | WUN-motif       | 1      | TCATTACGAA                             | -988 bp (+)                               | wound-responsive element                                                |
| <i>GmSnRK2.4</i> | Circadian       | 1      | CAANNNNATC                             | -1144 bp (+)                              | <i>Cis-acting</i> regulatory element involved in circadian control      |
|                  | ELI-box3        | 2      | AAACCAATT                              | -21 bp (-); -144 bp (+)                   | elicitor-responsive element                                             |
|                  | TC-rich repeats | 2      | ATTTCTCCA;<br>ATTTCTTCA                | -188 bp (+); -410 bp (+)                  | <i>Cis-acting</i> element involved in defense and stress responsiveness |
| <i>GmSnRK2.5</i> | Circadian       | 1      | CAANNNNATC                             | -1058 bp (+)                              | <i>Cis-acting</i> regulatory element involved in circadian control      |
|                  | TC-rich repeats | 2      | ATTTCTTCA                              | -385 bp (+); -596 bp (+)                  | <i>Cis-acting</i> element involved in defense and stress responsiveness |
| <i>GmSnRK2.6</i> | HSE             | 1      | AAAAAATTTC                             | -2 bp (-)                                 | <i>Cis-acting</i> element involved in heat stress responsiveness        |
|                  | MBS             | 1      | CAACTG                                 | -1452 bp (-)                              | MYB binding site involved in drought-inducibility                       |
|                  | TC-rich repeats | 2      | ATTTCTTCA;                             | -897 bp (-); -1047 bp (+)                 | <i>Cis-acting</i> element involved in defense and stress                |

|                   |                 |   |                           |                                            |                                                                            |
|-------------------|-----------------|---|---------------------------|--------------------------------------------|----------------------------------------------------------------------------|
| <i>GmSnRK2.7</i>  | Box-W1          | 1 | ATTCTCTAAC<br>TTGACC      | -345 bp (+)                                | responsiveness<br>fungal elicitor responsive element                       |
|                   | HSE             | 1 | AAAAAATTTTC               | -1222 bp (-)                               | <i>Cis-acting</i> element involved in heat stress<br>responsiveness        |
|                   | LTR             | 1 | CCGAAA                    | -180 bp (+)                                | <i>Cis-acting</i> element involved in low-temperature<br>responsiveness    |
|                   | TC-rich repeats | 1 | ATTTTCTTCA                | -442 bp (-)                                | <i>Cis-acting</i> element involved in defense and stress<br>responsiveness |
| <i>GmSnRK2.8</i>  | HSE             | 3 | AAAAAATTTTC               | -266 bp (+); -432 bp (-);<br>-267 bp (+)   | <i>Cis-acting</i> element involved in heat stress<br>responsiveness        |
|                   | TC-rich repeats | 1 | ATTTTCTTCA                | -167 bp (-)                                | <i>Cis-acting</i> element involved in defense and stress<br>responsiveness |
| <i>GmSnRK2.9</i>  | Circadian       | 3 | CAANNNNATC                | -111 bp (+); -1482 bp (+);<br>-175 bp (+)  | <i>Cis-acting</i> regulatory element involved in<br>circadian control      |
|                   | Box-W1          | 1 | TTGACC                    | -898 bp (+)                                | fungal elicitor responsive element                                         |
|                   | MBS             | 2 | CAACTG                    | -1463 bp (-); -1046 bp (+)                 | MYB binding site involved in<br>drought-inducibility                       |
|                   | TC-rich repeats | 1 | ATTCTCTAAC                | -943 bp (-)                                | <i>Cis-acting</i> element involved in defense and stress<br>responsiveness |
| <i>GmSnRK2.10</i> | Circadian       | 3 | CAANNNNATC                | -745 bp (-); -1104 bp (+);<br>-1024 bp (+) | <i>Cis-acting</i> regulatory element involved in<br>circadian control      |
|                   | HSE             | 1 | AAAAAATTTTC               | -924 bp (-)                                | <i>Cis-acting</i> element involved in heat stress<br>responsiveness        |
|                   | LTR             | 1 | CCGAAA                    | -1483 bp (+)                               | <i>Cis-acting</i> element involved in low-temperature<br>responsiveness    |
|                   | MBS             | 1 | TAACTG                    | -513 bp (-)                                | MYB binding site involved in<br>drought-inducibility                       |
|                   | TC-rich repeats | 2 | GTTTTCTTAC;<br>ATTTTCTCCA | -414 bp (+); -1051 bp (+)                  | <i>Cis-acting</i> element involved in defense and stress<br>responsiveness |
| <i>GmSnRK2.11</i> | HSE             | 1 | AAAAAATTTTC               | -1247 bp (+)                               | <i>Cis-acting</i> element involved in heat stress<br>responsiveness        |
|                   | MBS             | 1 | CAACTG                    | -1184 bp (+)                               | MYB binding site involved in<br>drought-inducibility                       |
|                   | TC-rich repeats | 1 | ATTTTCTCCA                | -1052 bp (-)                               | <i>Cis-acting</i> element involved in defense and stress<br>responsiveness |
| <i>GmSnRK2.12</i> | Circadian       | 1 | CAANNNNATC                | -307 bp (+)                                | <i>Cis-acting</i> regulatory element involved in                           |

|                   |                 |   |                                          |                                                                                    |                                                                            |
|-------------------|-----------------|---|------------------------------------------|------------------------------------------------------------------------------------|----------------------------------------------------------------------------|
|                   | Box-W1          | 1 | TTGACC                                   | -734 bp (+)                                                                        | circadian control<br>fungal elicitor responsive element                    |
|                   | HSE             | 2 | AAAAAATTTTC                              | -585 bp (+); -630 bp (+)                                                           | <i>Cis-acting</i> element involved in heat stress<br>responsiveness        |
|                   | LTR             | 1 | CCGAAA                                   | -1378 bp (-)                                                                       | <i>Cis-acting</i> element involved in low-temperature<br>responsiveness    |
|                   | MBS             | 1 | CAACTG                                   | -1205 bp (+)                                                                       | MYB binding site involved in<br>drought-inducibility                       |
|                   | TC-rich repeats | 3 | ATTTTCTCCA;<br>GTTTTCTTAC                | -366 bp (+); -690 bp (-);<br>-815 bp (+)                                           | <i>Cis-acting</i> element involved in defense and stress<br>responsiveness |
| <i>GmSnRK2.13</i> | Circadian       | 2 | CAANNNNATC                               | -58 bp (+); -586 bp (+)                                                            | <i>Cis-acting</i> regulatory element involved in<br>circadian control      |
|                   | Box-W1          | 1 | TTGACC                                   | -491 bp (-)                                                                        | fungal elicitor responsive element                                         |
|                   | HSE             | 2 | AAAAAATTTTC;<br>AGAAAATTCG               | -157 bp (-); -1022 bp (-)                                                          | <i>Cis-acting</i> element involved in heat stress<br>responsiveness        |
|                   | MBS             | 1 | CAACTG                                   | -500 bp (-)                                                                        | MYB binding site involved in<br>drought-inducibility                       |
|                   | TC-rich repeats | 2 | ATTTTCTTCA;<br>ATTCTCTAAC                | -1177 bp (-); -1323 bp (+)                                                         | <i>Cis-acting</i> element involved in defense and stress<br>responsiveness |
| <i>GmSnRK2.14</i> | Circadian       | 1 | CAANNNNATC                               | -1406 bp (-)                                                                       | <i>Cis-acting</i> regulatory element involved in<br>circadian control      |
|                   | HSE             | 3 | AAAAAATTTTC                              | -99 bp (-); -258 bp (+); -153<br>bp (-)                                            | <i>Cis-acting</i> element involved in heat stress<br>responsiveness        |
|                   | TC-rich repeats | 3 | ATTTTCTCCA;<br>ATTTTCTTCA;<br>ATTCTCTAAC | -102 bp (+); -805 bp (+);<br>-538 bp (+)                                           | <i>Cis-acting</i> element involved in defense and stress<br>responsiveness |
| <i>GmSnRK2.15</i> | Circadian       | 2 | CAANNNNATC                               | -927 bp (+); -1112 bp (+)                                                          | <i>Cis-acting</i> regulatory element involved in<br>circadian control      |
|                   | Box-W1          | 2 | TTGACC                                   | -616 bp (-); -656 bp (+)                                                           | fungal elicitor responsive element                                         |
|                   | HSE             | 6 | AAAAAATTTTC;<br>AGAAAATTCG               | -15 bp (-); -1176 bp (-);<br>-1236 bp (+); -73 bp (+);<br>-404 bp (-); -403 bp (-) | <i>Cis-acting</i> element involved in heat stress<br>responsiveness        |
|                   | MBS             | 2 | TAACTG                                   | -498 bp (+); -532 bp (-)                                                           | MYB binding site involved in<br>drought-inducibility                       |
| <i>GmSnRK2.16</i> | HSE             | 5 | AAAAAATTTTC                              | -20 bp (+); -459 bp (+); -68<br>bp (+); -55 bp (+); -81 bp (-)                     | <i>Cis-acting</i> element involved in heat stress<br>responsiveness        |



|                   |                   |           |                           |                                                       |                                                                         |                                                                    |
|-------------------|-------------------|-----------|---------------------------|-------------------------------------------------------|-------------------------------------------------------------------------|--------------------------------------------------------------------|
| <i>GmSnRK2.17</i> | TC-rich repeats   | 1         | ATTTTCTTCA                | -596 bp (+)                                           | <i>Cis-acting</i> element involved in defense and stress responsiveness |                                                                    |
|                   | Circadian         | 1         | CAANNNNATC                | -1073 bp (+)                                          | <i>Cis-acting</i> regulatory element involved in circadian control      |                                                                    |
|                   | HSE               | 3         | AAAAAATTTC                | -663 bp (+); -1262 bp (+);<br>-744 bp (+)             | <i>Cis-acting</i> element involved in heat stress responsiveness        |                                                                    |
|                   | MBS               | 1         | TAACTG                    | -185 bp (-)                                           | MYB binding site involved in drought-inducibility                       |                                                                    |
| <i>GmSnRK2.18</i> | TC-rich repeats   | 1         | ATTTTCTTCA                | -1437 bp (-)                                          | <i>Cis-acting</i> element involved in defense and stress responsiveness |                                                                    |
|                   | Circadian         | 2         | CAANNNNATC                | -96 bp (+); -1340 bp (-)                              | <i>Cis-acting</i> regulatory element involved in circadian control      |                                                                    |
|                   | Box-W1            | 1         | TTGACC                    | -832 bp (-)                                           | fungal elicitor responsive element                                      |                                                                    |
|                   | HSE               | 2         | AAAAAATTTC                | -203 bp (+); -1271 bp (-)                             | <i>Cis-acting</i> element involved in heat stress responsiveness        |                                                                    |
|                   | LTR               | 1         | CCGAAA                    | -672 bp (-)                                           | <i>Cis-acting</i> element involved in low-temperature responsiveness    |                                                                    |
| <i>GmSnRK2.19</i> | MBS               | 1         | TAACTG                    | -451 bp (+)                                           | MYB binding site involved in drought-inducibility                       |                                                                    |
|                   | TC-rich repeats   | 2         | GTTTTCTTAC;<br>ATTTTCTTCA | -456 bp (+); -1065 bp (-)                             | <i>Cis-acting</i> element involved in defense and stress responsiveness |                                                                    |
|                   | TC-rich repeats   | 1         | ATTTTCTCCA                | -273 bp (-)                                           | <i>Cis-acting</i> element involved in defense and stress responsiveness |                                                                    |
|                   | <i>GmSnRK2.20</i> | Circadian | 1                         | CAANNNNATC                                            | -316 bp (+)                                                             | <i>Cis-acting</i> regulatory element involved in circadian control |
|                   |                   | Box-W1    | 2                         | TTGACC                                                | -23 bp (+); -626 bp (+)                                                 | fungal elicitor responsive element                                 |
| HSE               |                   | 1         | AAAAAATTTC                | -768 bp (+)                                           | <i>Cis-acting</i> element involved in heat stress responsiveness        |                                                                    |
| MBS               |                   | 1         | CAACTG                    | -1314 bp (+)                                          | MYB binding site involved in drought-inducibility                       |                                                                    |
| <i>GmSnRK2.21</i> | TC-rich repeats   | 1         | GTTTTCTTAC                | -821 bp (+)                                           | <i>Cis-acting</i> element involved in defense and stress responsiveness |                                                                    |
|                   | Circadian         | 4         | CAANNNNATC                | -85 bp (+); -771 bp (-); -149<br>bp (+); -1478 bp (+) | <i>Cis-acting</i> regulatory element involved in circadian control      |                                                                    |
|                   | MBS               | 2         | TAACTG;<br>CAACTG         | -550 bp (-); -1459 bp (-)                             | MYB binding site involved in drought-inducibility                       |                                                                    |

|                   |                 |   |            |                            |                                                                         |
|-------------------|-----------------|---|------------|----------------------------|-------------------------------------------------------------------------|
| <i>GmSnRK2.22</i> | TC-rich repeats | 1 | ATTTTCTTCA | -1248 bp (-)               | <i>Cis-acting</i> element involved in defense and stress responsiveness |
|                   | HSE             | 1 | AGAAAATTCG | -896 bp (+)                | <i>Cis-acting</i> element involved in heat stress responsiveness        |
|                   | MBS             | 1 | CAACTG     | -142 bp (-)                | MYB binding site involved in drought-inducibility                       |
|                   | TC-rich repeats | 2 | ATTTTCTCCA | -1221 bp (+); -1481 bp (-) | <i>Cis-acting</i> element involved in defense and stress responsiveness |

---

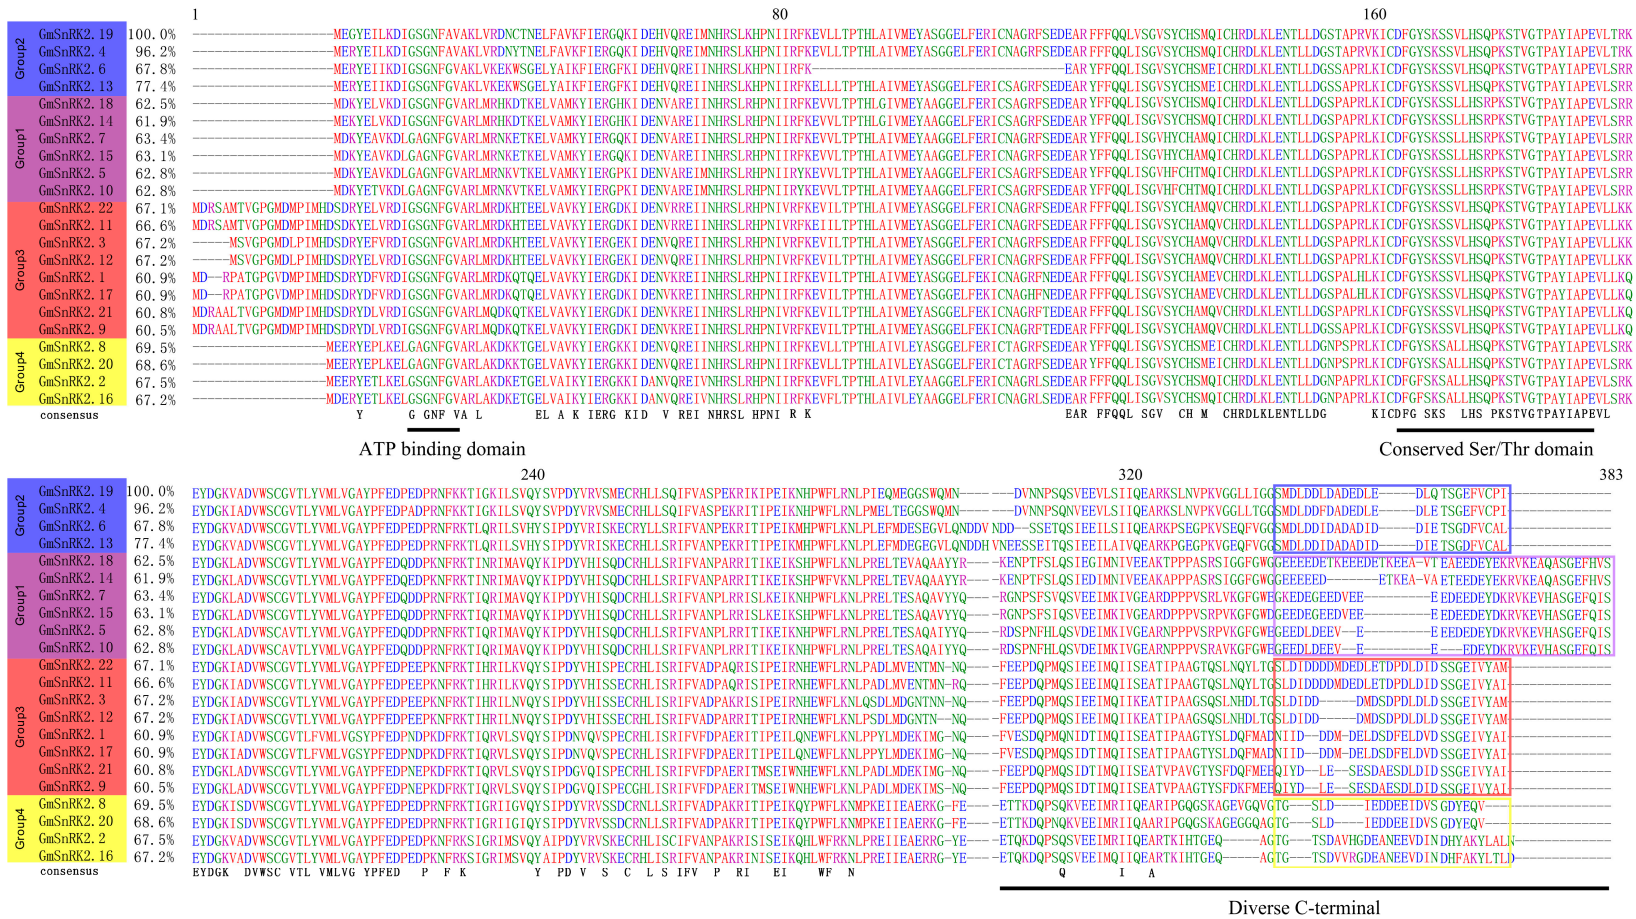

**Figure S1.** Multiple sequence alignment of GmSnRK2 proteins. ATP binding domain, converted Ser/Thr kinase domain, and diverse C-terminal were indicated by black lines at the bottom. The red, purple, blue and yellow boxes represented the C-terminal of GmSnRK2s from Group1, Group2, Group3 and Group4, respectively.

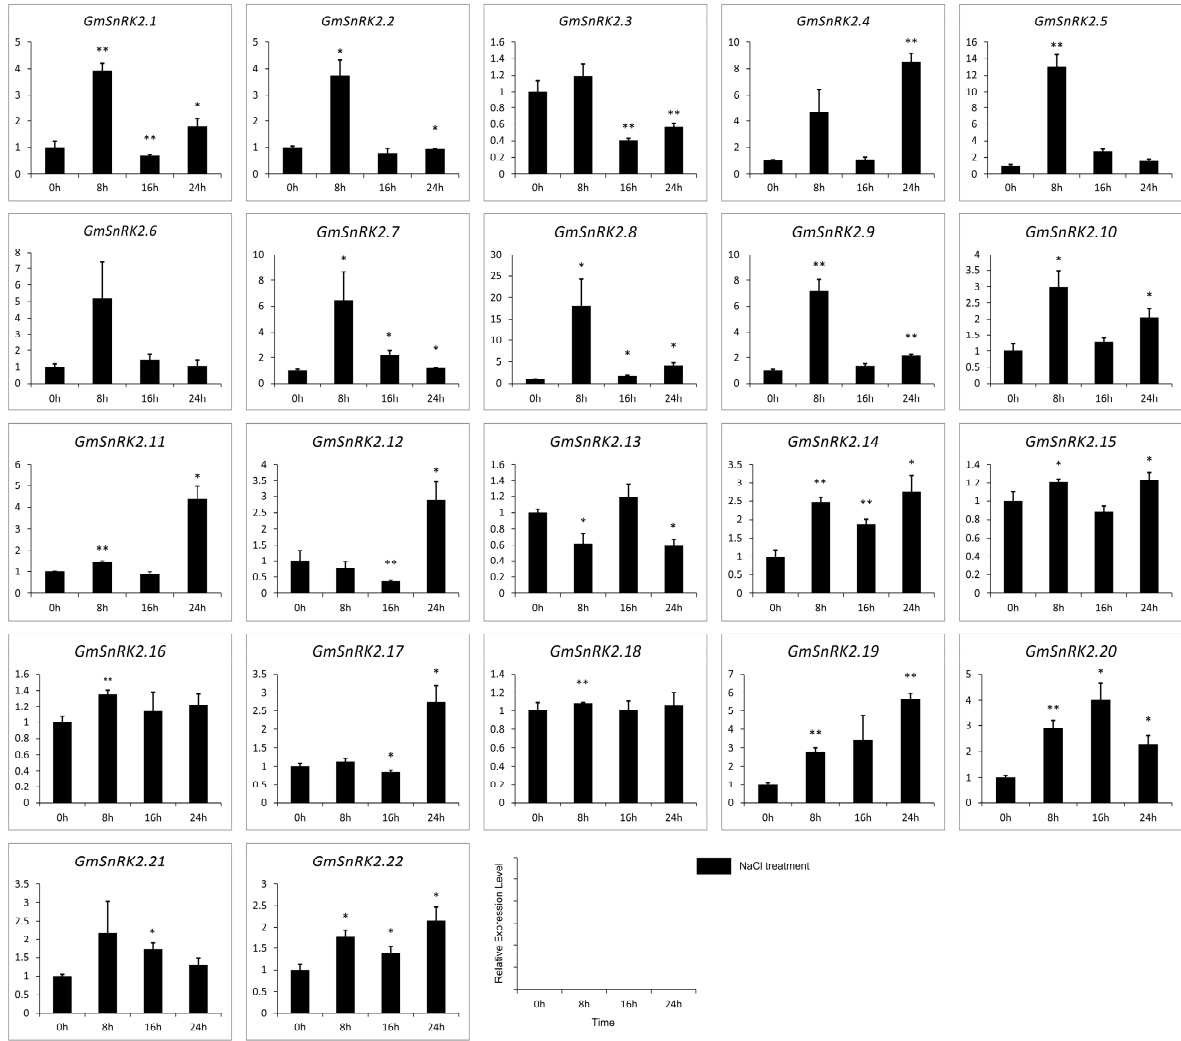

**Figure S2.** Expression patterns of the 22 *GmSnRK2s* under NaCl treatments with bar diagrams. The transcript levels of *GmSnRK2s* were normalized against *GmSKIP* transcript levels using  $2^{-\Delta\Delta Ct}$ . Error bars indicate the standard deviation. Statistically significant differences (Student's t-test) are indicated as follows: \*  $p < 0.05$ , \*\*  $p < 0.01$ .

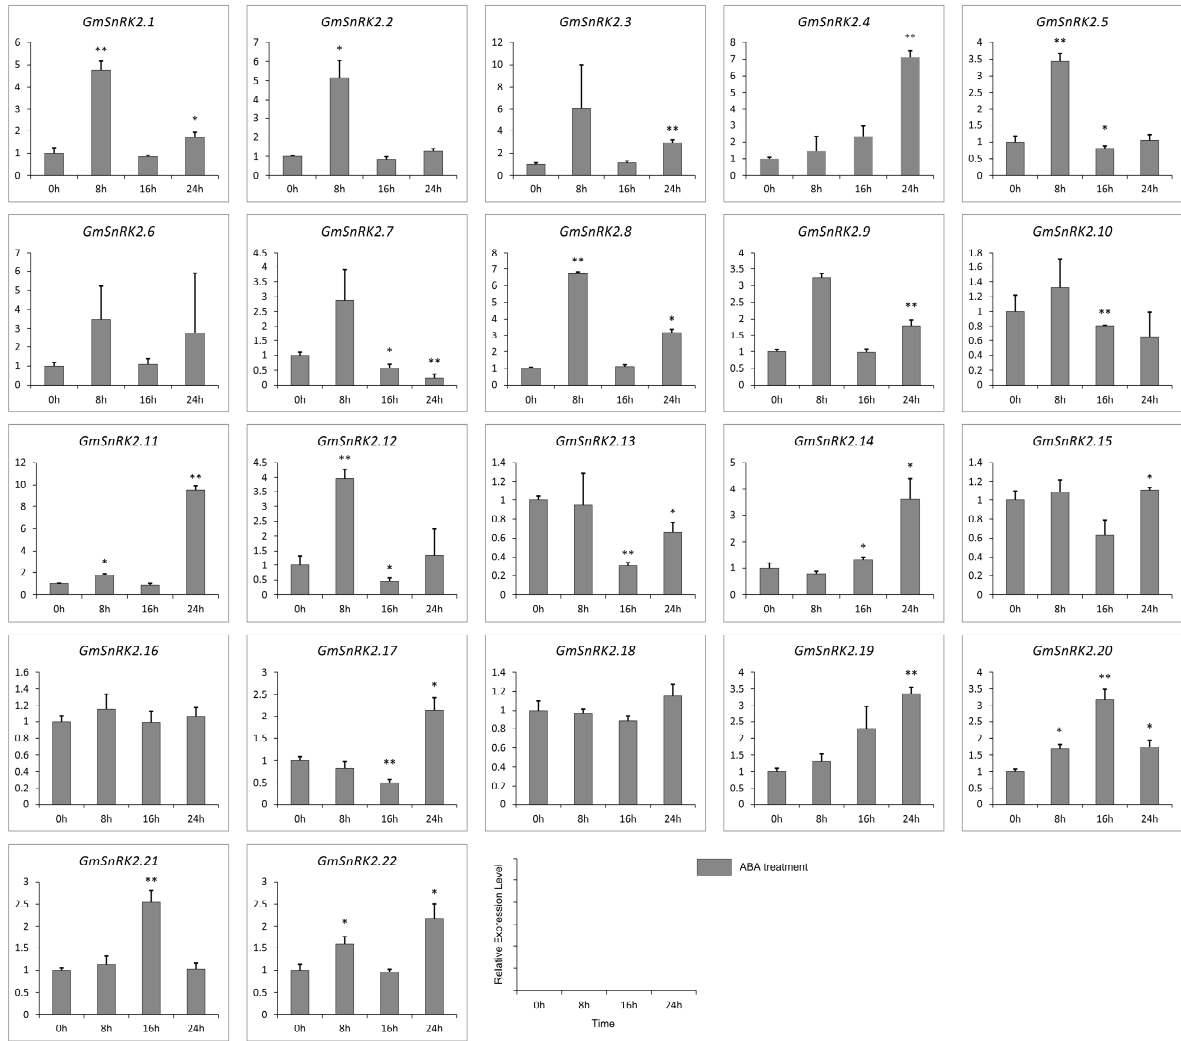

**Figure S3.** Expression patterns of the 22 *GmSnRK2s* under ABA treatments with bar diagrams. The transcript levels of *GmSnRK2s* were normalized against *GmSKIP* transcript levels using  $2^{-\Delta\Delta Ct}$ . Error bars indicate the standard deviation. Statistically significant differences (Student's *t*-test) are indicated as follows: \*  $p < 0.05$ , \*\*  $p < 0.01$ .

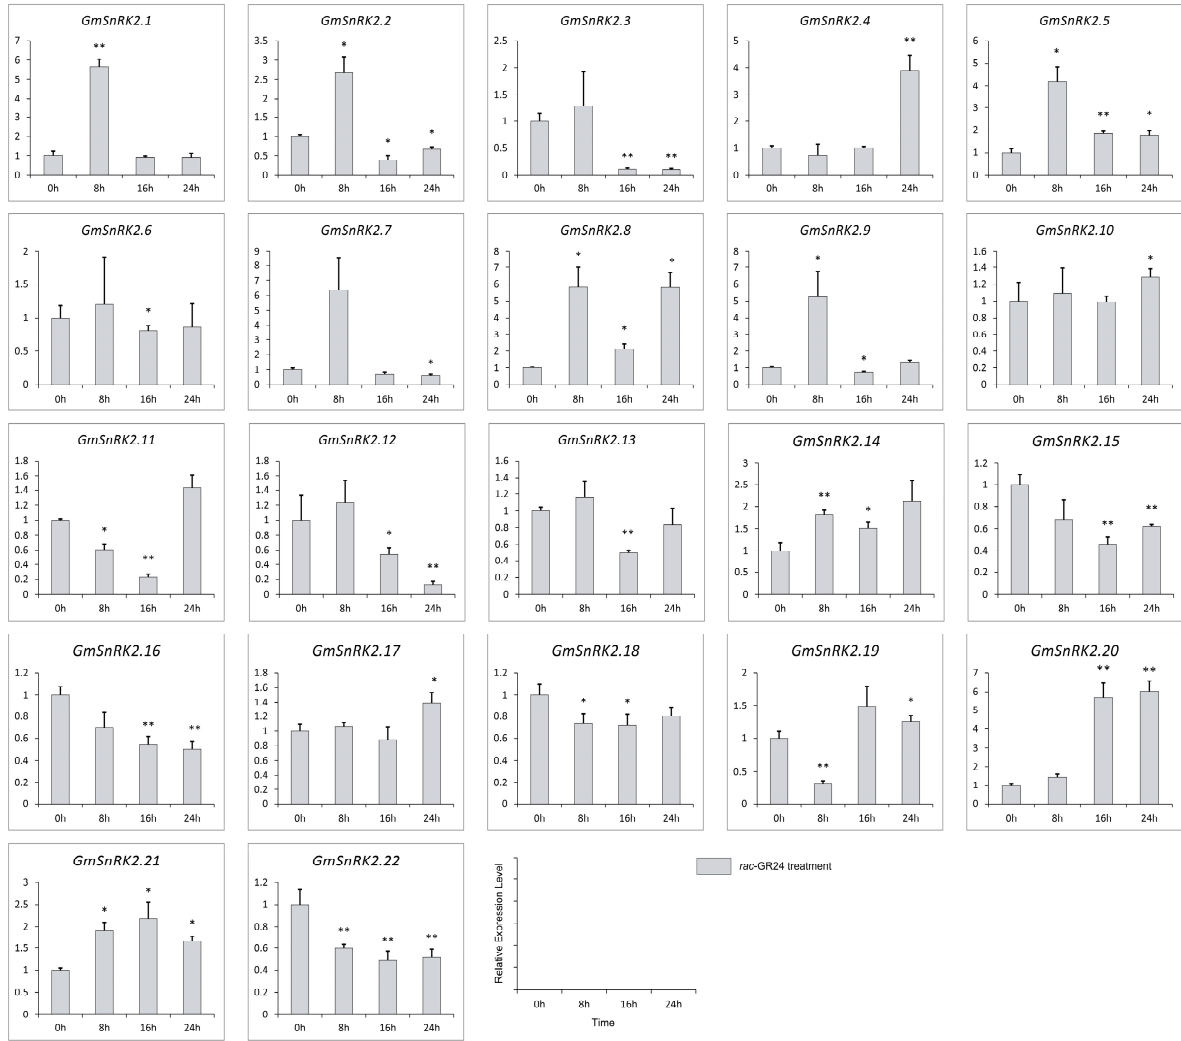

**Figure S4.** Expression patterns of the 22 *GmSnRK2*s under SLs treatments with bar diagrams. The transcript levels of *GmSnRK2*s were normalized against *GmSKIP* transcript levels using  $2^{-\Delta\Delta Ct}$ . Error bars indicate the standard deviation. Statistically significant differences (Student's *t*-test) are indicated as follows: \*  $p < 0.05$ , \*\*  $p < 0.01$ .

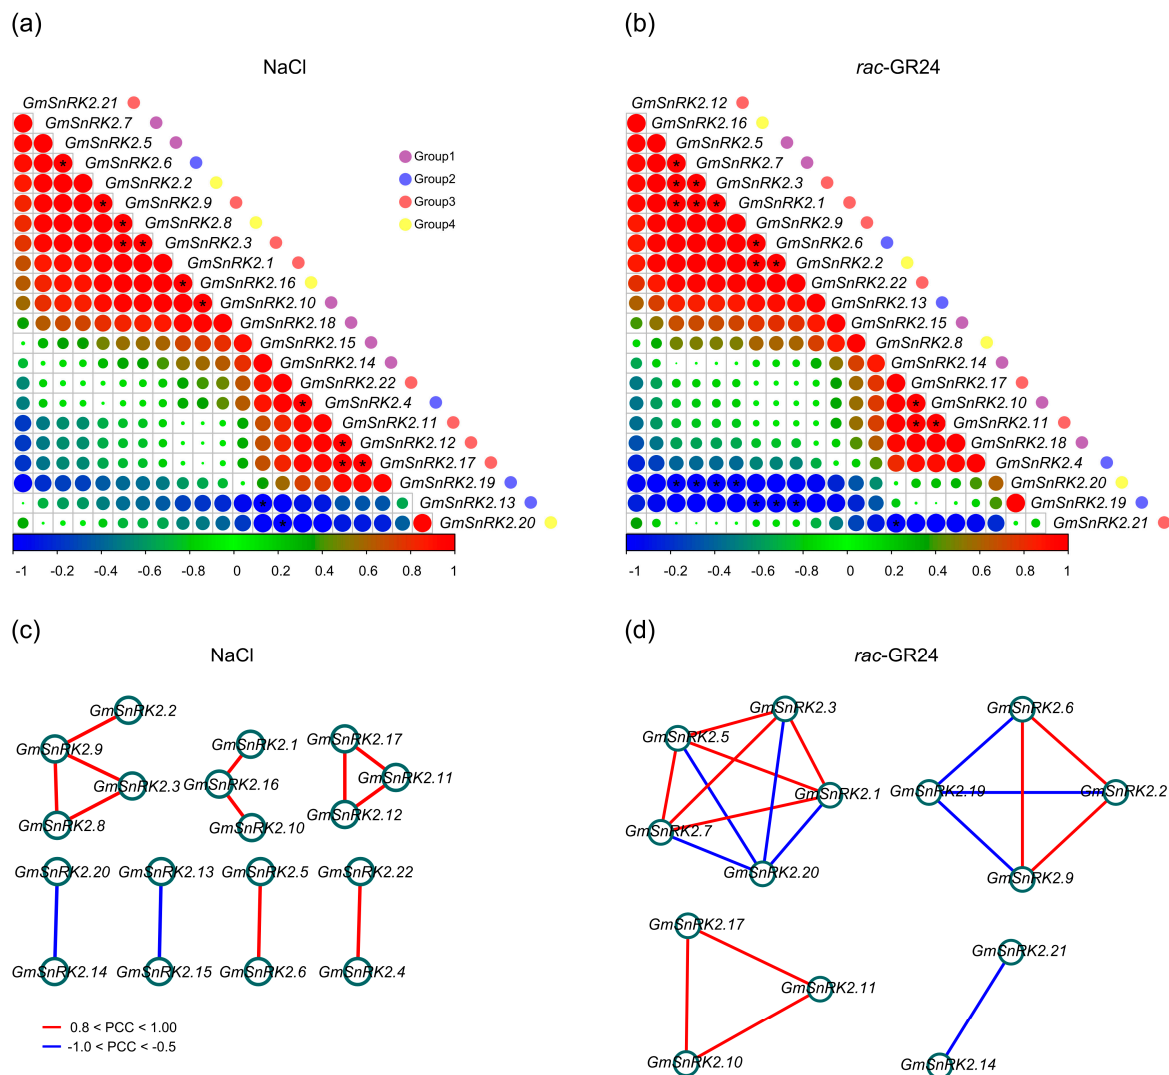

**Figure S5.** Correlations and co-regulatory networks of *GmSnRK2s* under NaCl and SLs treatments. Correlation analysis of *GmSnRK2* genes under NaCl (a) and SLs (b) treatments were performed based on the PCCs of gene pairs calculated using R package program. Correlations were indicated by the size and color of circles. Below bar represented the correlation values of PCCs. Red and blue indicate positive correlation and negative correlation, respectively. Gene name was listed at the right. Group1, Group2, Group3 and Group4 were marked as purple, blue, red and yellow circles, respectively. Black star represented the correlation with  $p$ -value  $\leq 0.05$ . Co-regulatory network of *GmSnRK2s* under NaCl (c) and SLs (d) treatments were illustrated by Cytoscape. The significant PCCs of gene pairs ( $p$ -value  $\leq 0.05$ ) were included, and the different correlation levels of gene pairs were marked by edge line with different colors as showed at the bottom.
